# Supplementary material for: The human leukemia virus HTLV-1 alters the structure and transcription of host chromatin in cis
Source: PubMed Central journal article supplement (PMC6019074; doi:10.7554/elife.36245), 2018-06-26
Supplement: elife-36245-supp3.pdf [file elife-36245-supp3.pdf]

# q4C Data analysis steps

- Data (Fastq) from sequencing facility: demultiplexed by barcode

## Trim

- remove low quality reads and linker sequences

## Digest

- digest NlaIII in silico fragments to break composite reads

## Align

- align against combined reference (human + viral)

## Extraction

- identify and quantify ligation sites

## Filter

- remove barcode errors, decrease noise by selecting convergent reads

## Peak calling

- identify reproducible contacts.
